# Supplementary figures and images for: Molecular evolution of 5S rDNA region in Vigna subgenus Ceratotropis and its phylogenetic implications
Source: Springer Nature journal article supplement (doi:10.1007/s00606-009-0178-4), 2009-05-19

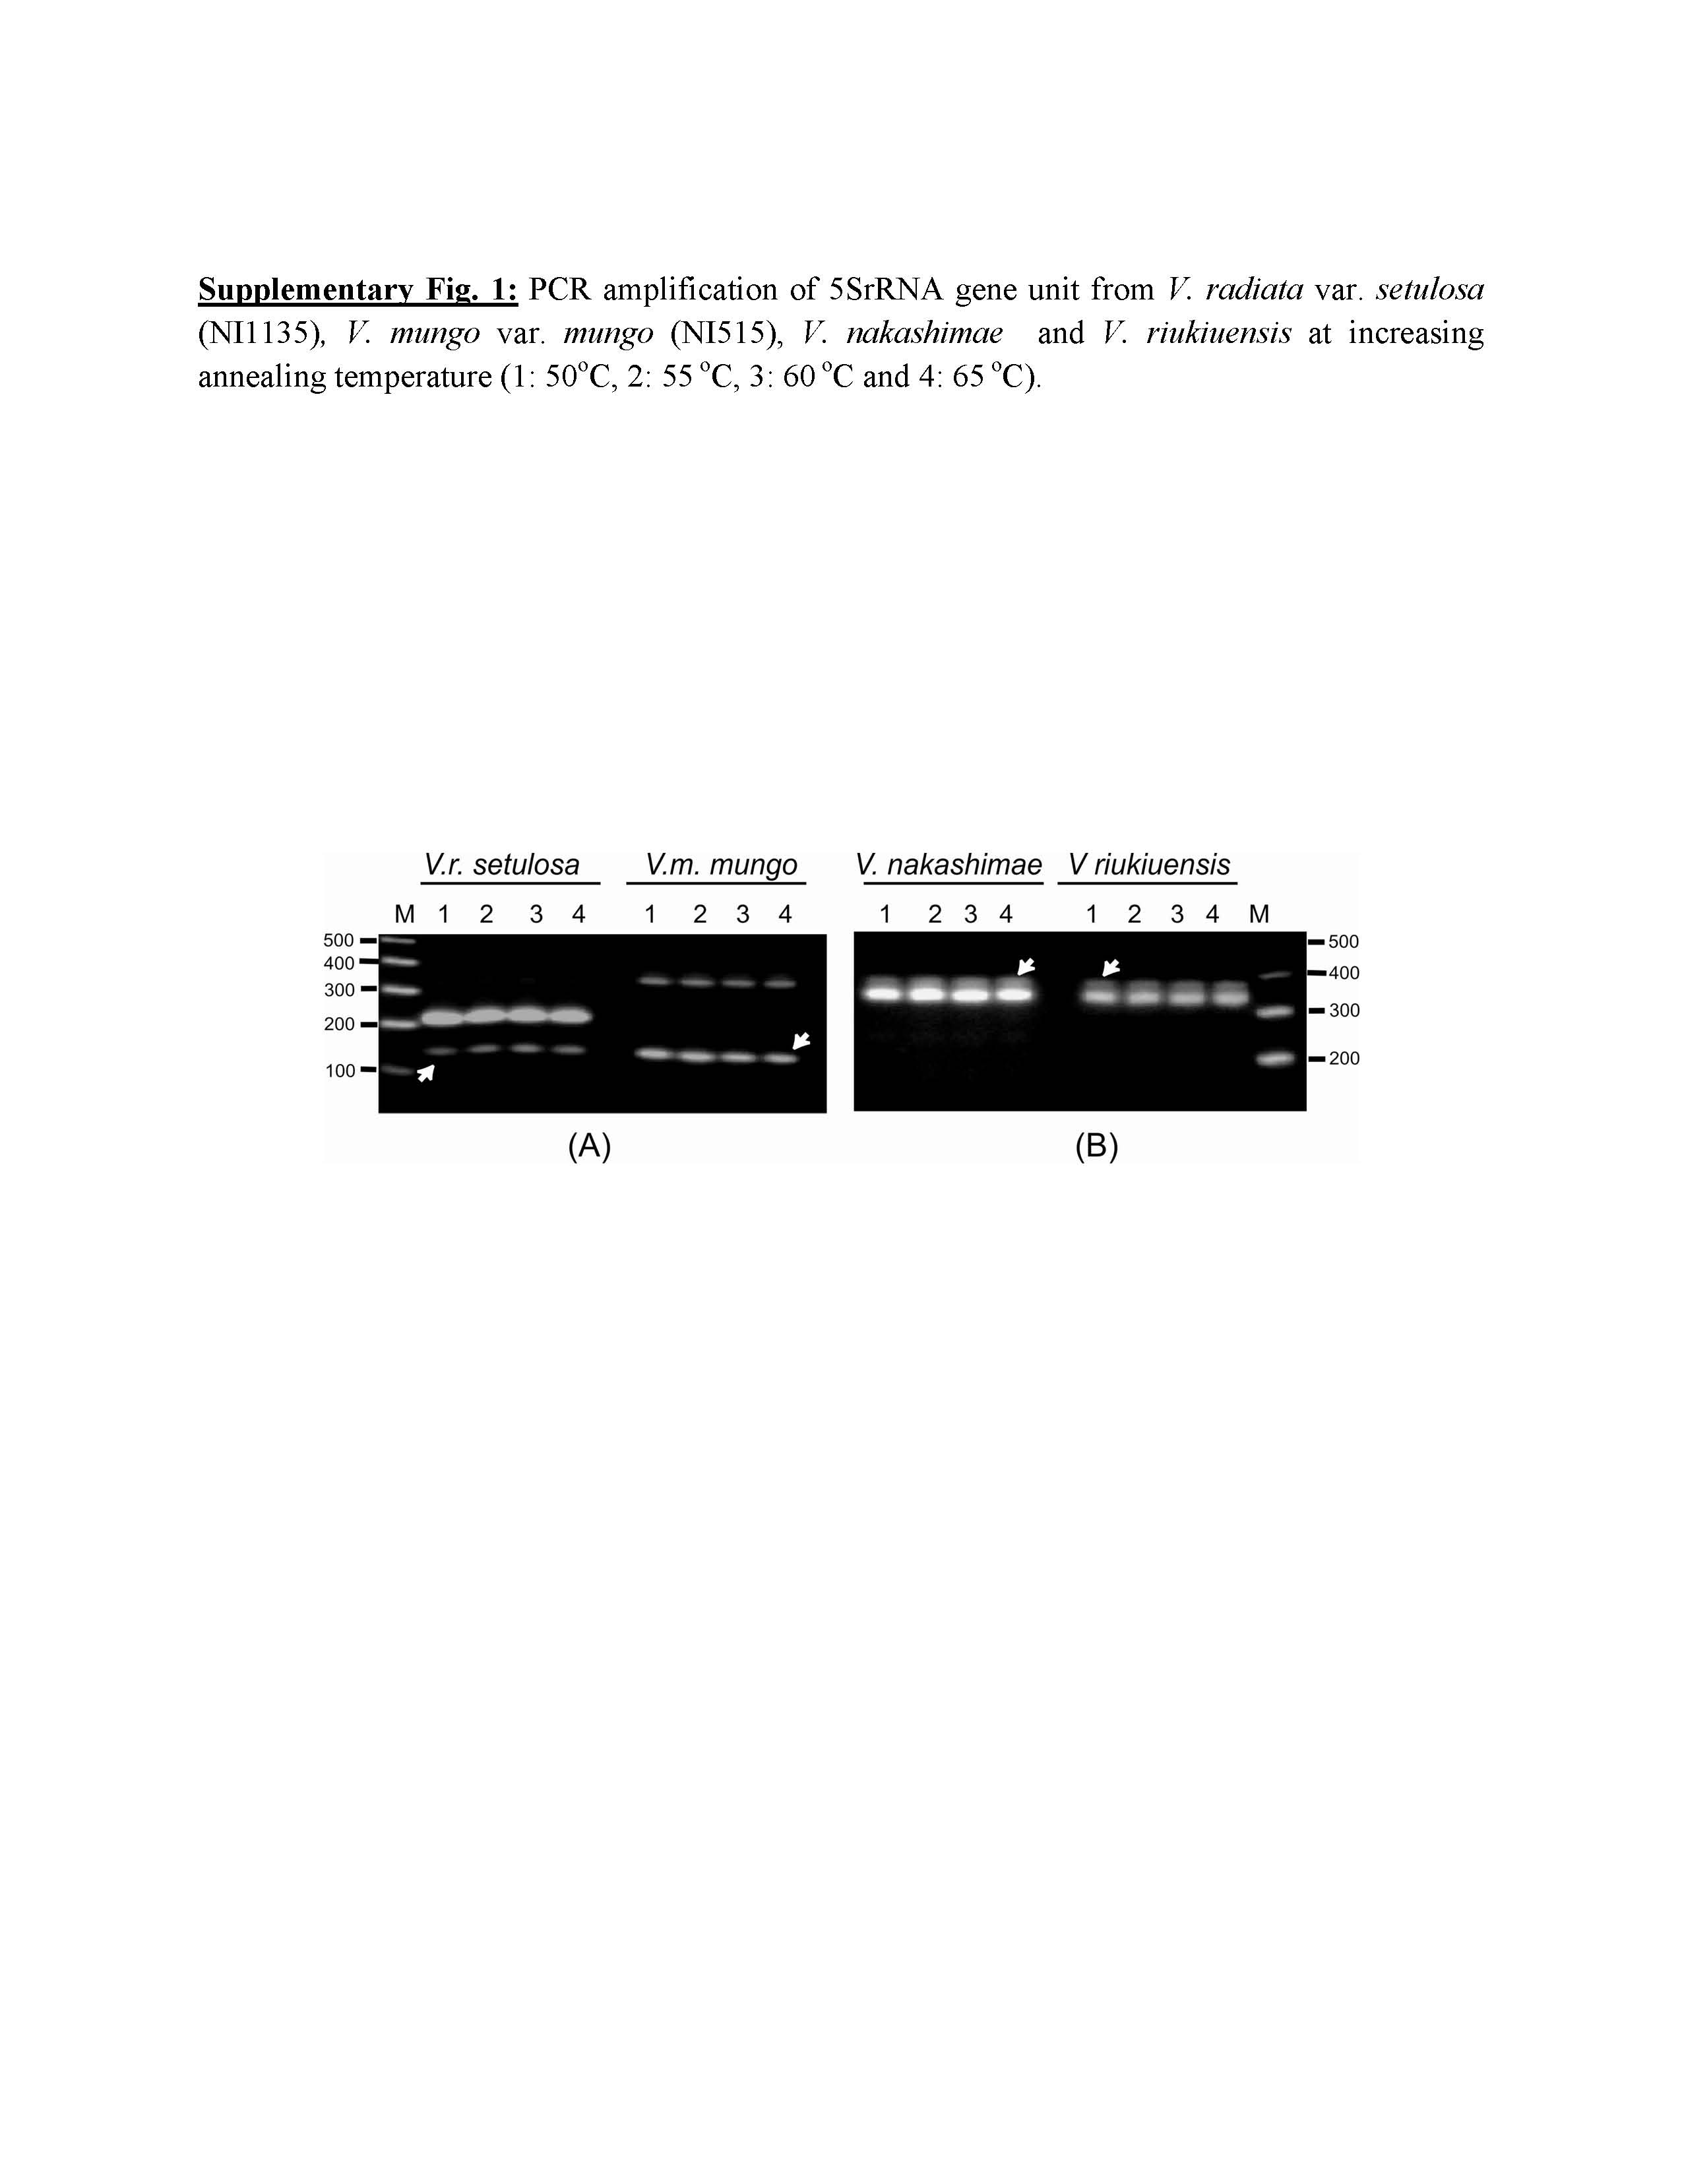

Supplement: MOESM3 [file 606_2009_178_MOESM3_ESM.doc]
